# Supplementary material for: GANT-61 induces cell cycle resting and autophagy by down-regulating RNAP III signal pathway and tRNA-Gly-CCC synthesis to combate chondrosarcoma
Source: PubMed Central journal article supplement (PMC10366213; doi:10.1038/s41419-023-05926-6), 2023-07-24

Figure 3 full western blot

GLI1

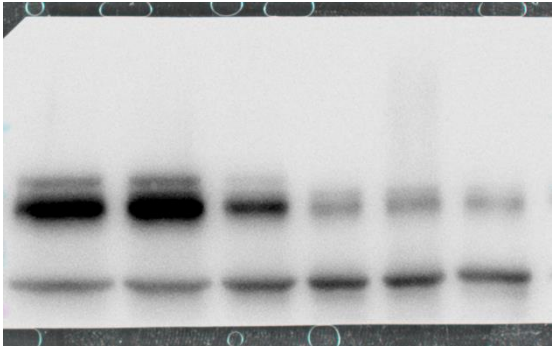

GLI2

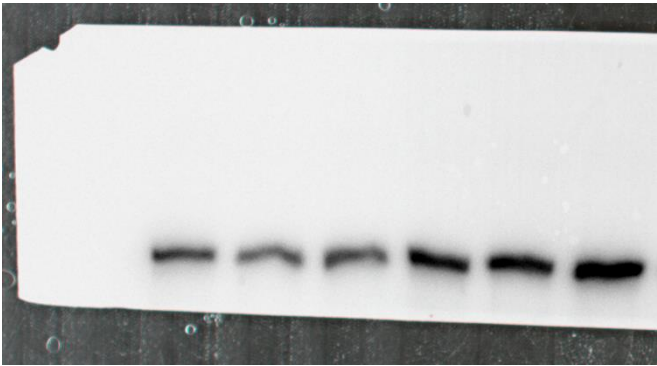

$\beta$ -actin

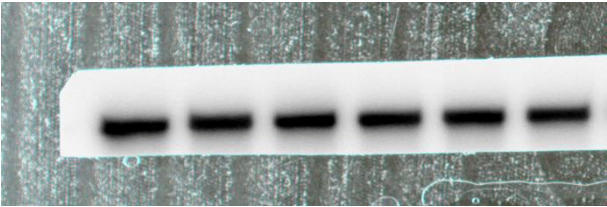

Figure 4 full western blot

CDK1

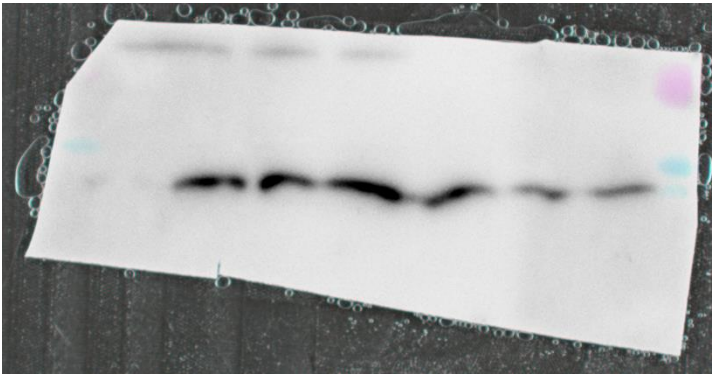

Cyclin A2

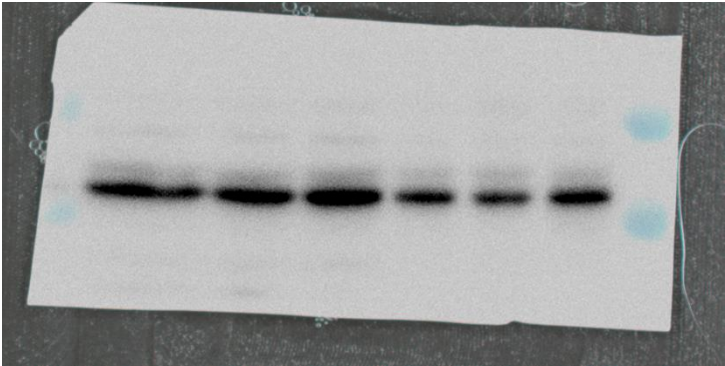

Cleaved-  
Casepase 3

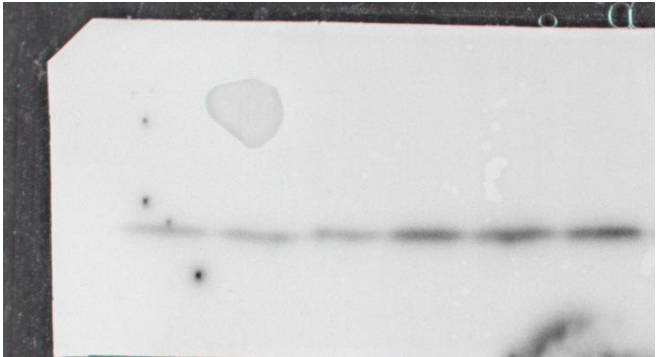

$\beta$ -actin

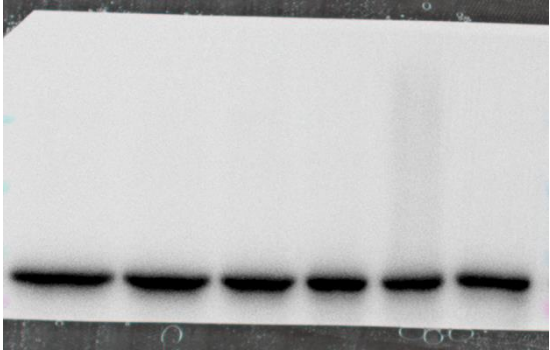

Figure 5 full western blot

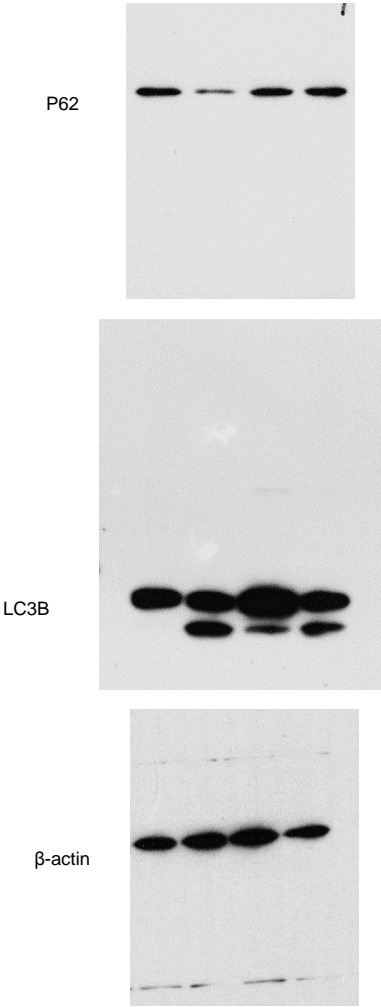

Supplement: 41419_2023_5926_MOESM3_ESM.pdf [file 41419_2023_5926_MOESM3_ESM.pdf]
